# Supplementary material for: Genome-wide identification, characterisation and functional evaluation of WRKY genes in the sweet potato wild ancestor Ipomoea trifida (H.B.K.) G. Don. under abiotic stresses
Source: PubMed Central journal article supplement (PMC6889533; doi:10.1186/s12863-019-0789-x), 2019-12-03
Supplement: 12863_2019_789_MOESM2_ESM.pdf [file 12863_2019_789_MOESM2_ESM.pdf]

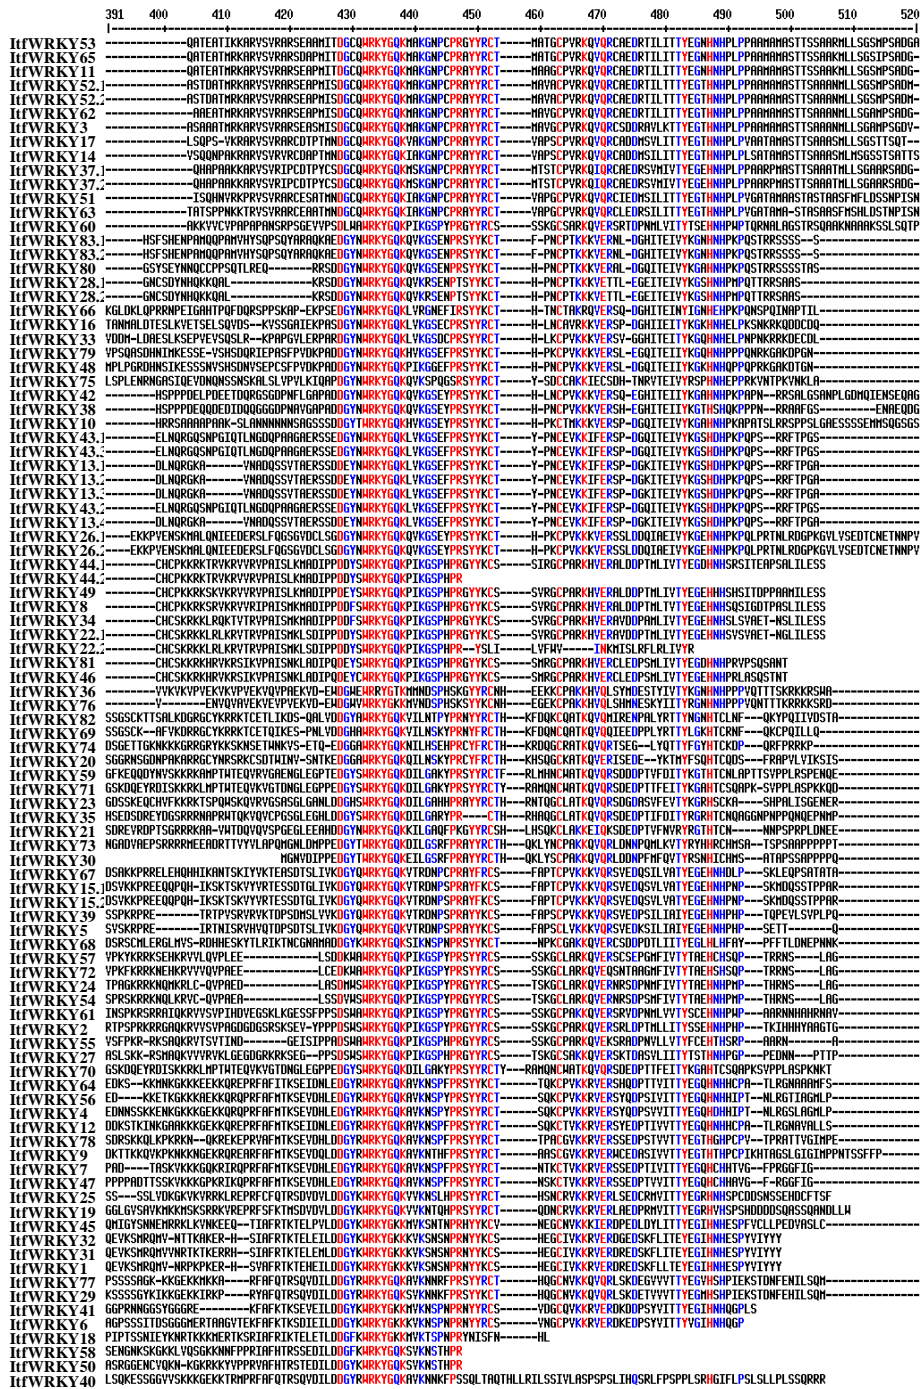

**Fig S1.** Alignment of ItfWRKY domain sequences. The alignment was performed by the Multiple interface page (<http://multalin.toulouse.inra.fr/multalin/>). The conserved WRKY aa and zinc-finger motifs are highlighted in red. Gaps are indicated by dashes.
